1 **Prevalence of Carpal Tunnel Syndrome and its associated factors**  
2 **among patients with musculoskeletal complaint at Dilchora Referral**  
3 **Hospitals in Dire Dawa administration, Eastern Ethiopia, 2022**

4 **Tewodros Yesuf<sup>1</sup>, Hailu Aragie<sup>2</sup>, Yared Asmare<sup>3\*</sup>**

5

6 **Affiliation**

- 7 1. TY: Lecturer of Human Anatomy, Biomedical department, College of Medicine and Health  
8 Sciences, University of Dire Dawa, Dire Dawa, Ethiopia. E-mail: [tewodrosyesuf@gmail.com](mailto:tewodrosyesuf@gmail.com)  
9 2. HA: Lecturer of Human Anatomy, School of Medicine, College of Medicine and Health  
10 Sciences, University of Gondar, Gondar, Ethiopia. E-mail: [hailuaragie995@gmail.com](mailto:hailuaragie995@gmail.com).  
11 3. YA: Assistant Professor of Human Anatomy, School of Medicine, College of Medicine and  
12 Health Sciences, University of Gondar, Gondar, Ethiopia. E-mail: [kyared091107@gmail.com](mailto:kyared091107@gmail.com)

13

14

15

16 **\* Correspondence**

17 Assistant Professor of Human Anatomy, School of Medicine, College of Medicine and Health  
18 Sciences, University of Gondar, Gondar, Ethiopia. E-mail: [kyared091107@gmail.com](mailto:kyared091107@gmail.com)

19

## 20 **Abstract**

21 **Background:** Carpal tunnel syndrome (CTS) is a chronic focal mono-neuropathy caused by  
22 mechanical distortion of the nerve at the carpal tunnel. It is thought to affect between 4 and 5 %  
23 of people worldwide, 50 per1000 persons in developed countries, 12.1% in east Africa and 29.2%  
24 Ethiopia. The common risk factors include but not limited to, age, sex, inflammatory conditions,  
25 pregnancy, diabetes mellitus, and hypertension. Despite this, carpal tunnel syndrome prevalence  
26 and its associated factors among patients with musculoskeletal complaints are unaddressed.

27 **Objectives:** This study's aim was to assess the prevalence of carpal tunnel syndrome and its  
28 associated factors among patients with musculoskeletal complaints in Dire Dawa, Eastern  
29 Ethiopia.

30 **Methodology:** An institution-based cross-sectional study was conducted from June 1 to 30, 2022  
31 at Dilchora referral hospital. 265 study participants were selected using the systematic sampling  
32 technique. Interviewing techniques and physical examination of the hands and wrists were used to  
33 get the data. Epi Data version 3.1 was used to enter, clean up, and edit the data before exporting it  
34 for analysis to SPSS version 23.0 software. Bivariable and multivariable logistic regression were  
35 carried out with a 95% confidence interval to identify the association of independent and dependent  
36 variables. A P-value of 0.05 was considered statistically significant.

37 **Result:** A total of 260 respondents were included in this study. The prevalence of clinically proven  
38 carpal tunnel syndrome among study participants was 10.8%, with a 95 % CI of (6.99 to 14.6). A  
39 multivariable analysis found that being female (AOR: 3.26 (95% CI: 1.05, 10.08), being physically  
40 inactive (AOR: 6.32 (95% CI: 1.95, 20.52), diabetes mellitus (AOR: 4.23 (95% CI: 1.47, 11.97)),  
41 hypertension (AOR: 6.07 (95% CI: 1.70, 21.65)), hand ratio  $\leq 2.1$  (AOR: 7.31(95% CI: 1.80,

42 29.66)), and wrist ratio  $\geq 0.72$  (AOR: 5.94 (95% CI: 2.11, 16.72)) were statistically associated  
43 factors of carpal tunnel syndrome. But, BMI were not statistically associated with CTS.

44 **Conclusion:** The prevalence of carpal tunnel syndrome among patients with musculoskeletal  
45 compliant was 10.8%. Several risk factors for CTS have been identified.

46 **Key words:** *Carpal Tunnel Syndrome, Hand Dimension, Wrist Dimension and prevalence*

47

48

49

50

51

52

53

54

55

56

57

58

59  
60  
61  
62  
63  
64  
65  
66  
67  
68  
69  
70  
71  
72  
73  
74  
75  
76  
77  
78  
79  
80  
81

## Introduction

Musculoskeletal disorder (MSD) is an injury of the muscles, tendons, ligaments, nerves, joints, cartilage, bones, or blood vessels in the arms, legs, head, neck, or back that is caused or aggravated by certain medical conditions and tasks such as lifting, pushing, pulling, repetitive task, awkward posture. It is the most common cause of physical disability and severe long-term pain. Population surveys estimated that for a one-month period of recall, up to 50% of people in the general population experience musculoskeletal pain at one or more anatomical sites. Carpal tunnel syndrome is considered as one of the six common cause musculoskeletal disorder(1).

The carpal tunnel (CT) is found at the base of the hand. The transverse carpal ligament is a thick fibrous roof, and the eight carpal bones form part of its border (TCL). The tunnel allows for the passage of the thumb's flexor pollicis longus (FPL) tendon, eight digital flexor tendons (two for each of the medial four fingers), their flexor synovial sheaths, and the median nerve (MN). Because of this, CT is relatively densely packed, and any circumstance that could increase the volume of the structures within it could result in MN compression. This may then result in the nerve's ischemia, which manifests as pain and paresthesia(4).

Carpal tunnel syndrome (CTS) is the most common and well-known upper limb entrapment neuropathy, accounting for 90% of all entrapment neuropathies. It is characterized as a chronic focal compressive mono-neuropathy or radiculopathy caused by mechanical distortion of the nerve at the site where it passes through a narrow, non-flexible anatomical structure, which results in an ischemic response to the median nerve due to repetitive motion and high force. It frequently results in prolonged impairment that necessitates surgical intervention (5).

All signs of carpal tunnel syndrome include pain in the hand, unpleasant tingling, pain or numbness in the distal distribution of the median nerve (thumb, index, middle finger, and radial side of the

82 ring finger), and a decline in grip strength and function of the affected hand are all signs of carpal  
83 tunnel syndrome(6,7). The symptoms are frequently worse at night, and daytime tasks involving  
84 wrist flexion are associated with clumsiness. Patients frequently speak of the "flick sign," a  
85 phenomena in which shaking or flicking their wrists alleviates discomfort (8).

86 The diagnosis of CTS is made based on the presence of specific symptoms (hand paraesthesia,  
87 weakness and pain in the distribution of the median nerve); as well as positive results from a variety  
88 of provocative stress tests, including the Tinel's, Phalen's, and carpal tunnel compression tests;  
89 and confirmatory electrophysiology. The electrophysiological diagnostic criteria used were a distal  
90 motor latency (DML) of more than 4.0 milliseconds and/or a distal sensory latency of more than  
91 3.5 milliseconds at the wrist level. Asymmetry in conduction times between both hands of greater  
92 than 1.0 milliseconds for motor conduction or 0.5 milliseconds for sensory conduction was also  
93 considered abnormal(9).

94 The question of whether a syndrome that is primarily responsible for the onset of CTS and its  
95 prevention is one that is occupationally caused or personally attributable has been the subject of  
96 intense discussion over the past few decades. In many instances, the cause of CTS is unknown, but  
97 several risk factors have been linked to its onset and exacerbation. Risk factors related to the  
98 environment are the most important. Long-term wrist flexion or extension postures, repetitive  
99 flexor muscle activity, vibration exposure, and any disease that congests or limits the capacity of  
100 the carpal tunnel might cause symptoms to appear. Among the most frequent causes of CTS are  
101 disorders such as misaligned Colles' fracture, edema from infection or trauma, posttraumatic  
102 arthritis, or tumorous conditions including ganglion, lipoma, or xanthoma. Physical inactivity is a  
103 personal risk factor for CTS, and the syndrome can occasionally be linked to systemic diseases  
104 like obesity, diabetes, thyroid dysfunction, amyloidosis, and Raynaud's syndrome(10–18).

105 A number of interrelated pathophysiologic mechanisms, such as increased carpal tunnel pressure,  
106 injury to the median nerve's microcirculation, and changes to the connective tissue of the median  
107 nerve, as well as inflammation and hypertrophy of the synovial tissue, can explain the occurrence  
108 of carpal tunnel syndrome (CTS) (19).

109 Using univariate and multivariate analysis, the morphometric examination of the hand, wrist, and  
110 other body parameters has been examined to assess the likelihood of susceptibility to carpal tunnel  
111 syndrome (CTS). Positive correlations between several hand and body measurements have thus  
112 been repeatedly shown. Idiopathic carpal tunnel syndrome (ICTS) is more likely to occur in hands  
113 that are larger, thicker, and have squarer wrists, or "coarse" hands)(6,7,19–22).

114

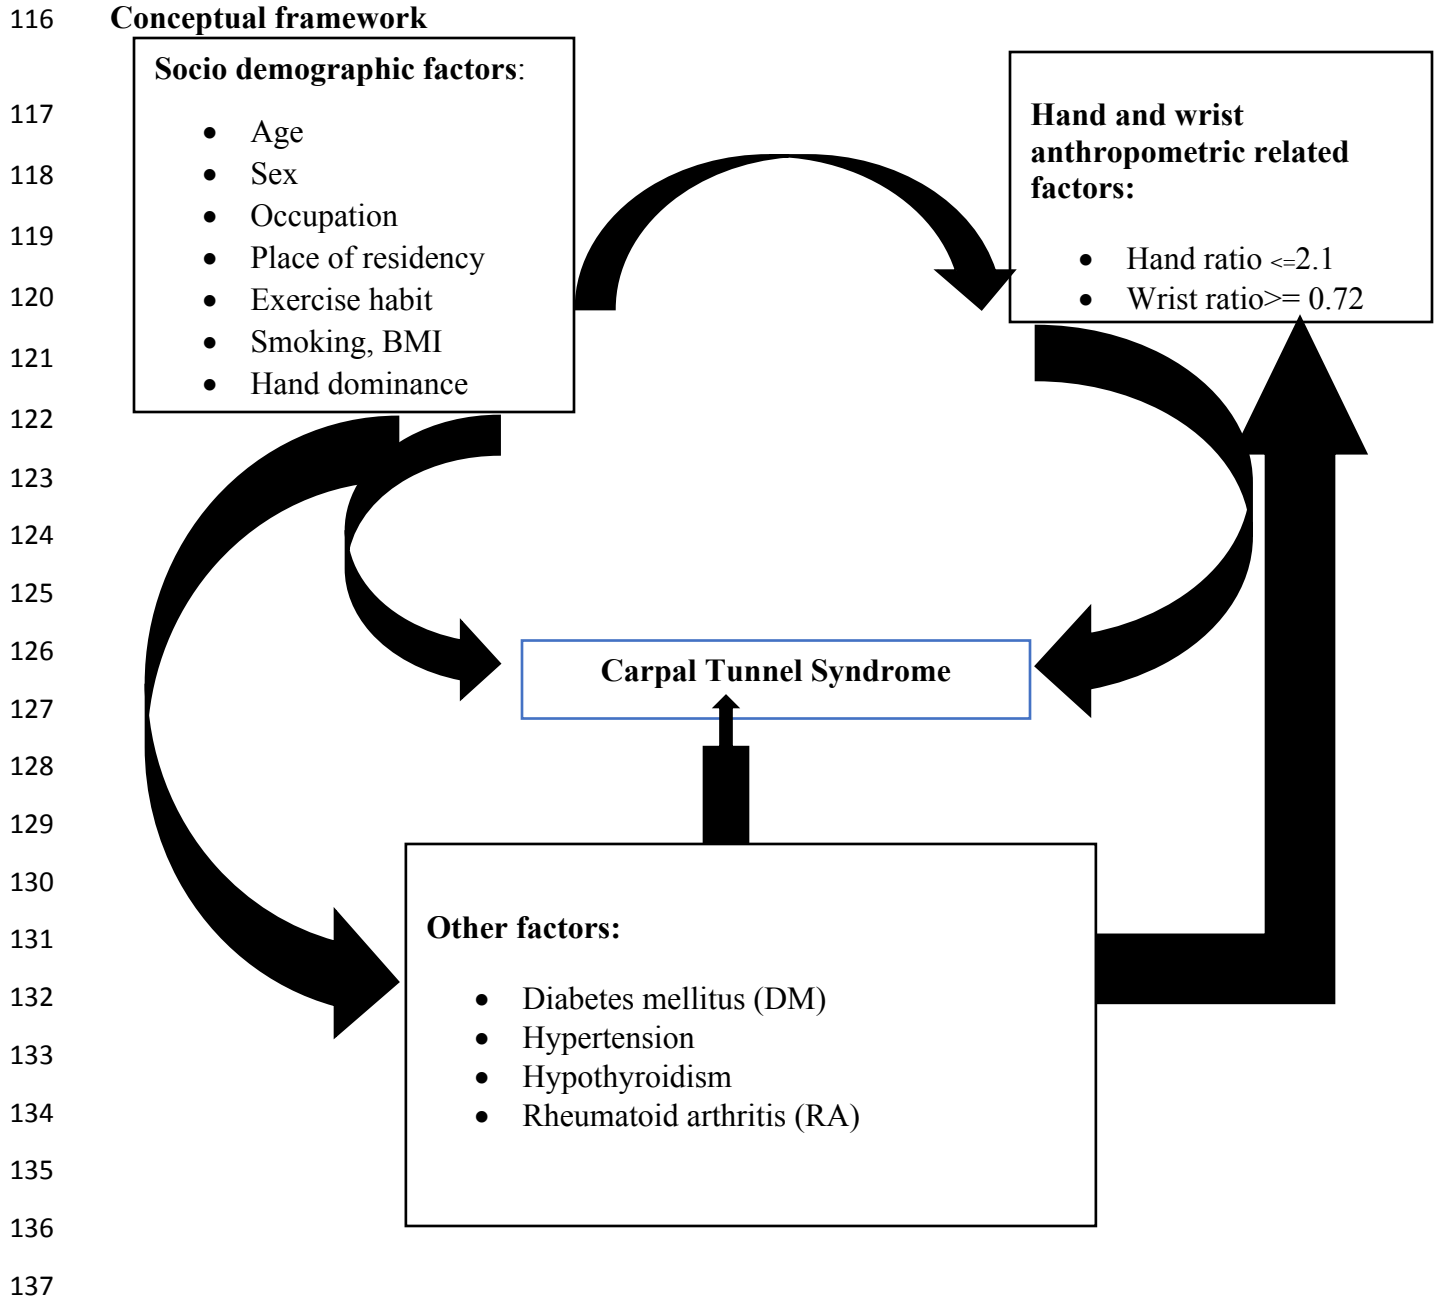

138 **Source:** constructed by the investigator from the literatures included in the study

139 Conceptual framework on factors associated with carpal tunnel syndrome

140

141

142

144 **Objectives of the study**

145 **General objective**

146 To assess the prevalence of carpal tunnel syndrome and its associated factors among patients  
147 with musculoskeletal complaints attending medical and orthopedic outpatient department at  
148 Dill Chora referral hospital in Dire Dawa, Eastern Ethiopia, June 2022.

149 **Specific Objectives**

- 150 1. To determine the prevalence of carpal tunnel syndrome among patients with  
151 musculoskeletal compliant attending the medical and orthopedic outpatient department.
- 152 2. To identify factors associated with carpal tunnel syndrome among patients with  
153 musculoskeletal compliant attending the medical and orthopedic outpatient department.

154

155

156

157



## 158 **Methods and materials**

### 159 **Study design**

160 An Institution-based cross-sectional study design was employed.

### 161 **Eligibility criteria**

#### 162 **Inclusion criteria**

- 163 • Patients who have musculoskeletal complaint and who are willing to participate the study.

#### 164 **Exclusion criteria**

- 165 • Patients with congenital shoulder, elbow, and hand musculoskeletal abnormalities, recent  
166 fractures or injuries, and surgeries to the shoulder, elbow, and hand
- 167 • Patient with cognitive impairment that interfere communication.

### 168 **Sample Size Determination**

169 The sample size for the first objective was determined by the formula for single population  
170 proportions, using the assumption of a 5% level of significance, P = Population proportion 50%,  
171 since no data related to the prevalence of CTS among patients with musculoskeletal complaints  
172 was available, marginal error of 5 %, and a 10% nonresponse rate. Considering the last three  
173 months of outpatient flow on average, a total of 1,932 clients were diagnosed with diseases of the  
174 musculoskeletal system (based on HMIS disease classification). So, 644 patients with  
175 musculoskeletal complaints were assumed to be available during one month of data collection. So,  
176 the sample was taken from a relatively small population (N = 644). The required sample size was  
177 obtained by the following calculation:

$$178 \mathbf{n = z^2 p (1-p)/d^2,}$$

179 Where, n= sample size, p= prevalence, d= margin of error

| Variable          | Associated factors of CTS* |             | Calculated sample size | Reference |
|-------------------|----------------------------|-------------|------------------------|-----------|
|                   | Exposed                    | Non Exposed |                        |           |
| Diabetes Mellitus | Yes 17.53%                 | No 82.47%   | 165                    | (39)      |
| Hypertension      | Yes 20.17%                 | No 79.83%   | 179                    | (39)      |

180  $n = (1.96)^2 \times (0.5)(0.5) / (0.05)^2 = 384.16 = 384$

181  $n = n / (1 + n/N), n = 384 / (1 + 384/644), n = 241$

182 Sample Size Determination for the Second Objective

183 Double population proportion formula was used to determine the sample size for the factors  
 184 associated with carpal tunnel syndrome. Sample size was calculated for some of the associated  
 185 factors obtained from different literatures by using the Stat-calc of Epi Info statistical software  
 186 version 7 with the following assumptions:

- 187 • Confidence level = 95%
- 188 • Power = 80%
- 189 • The ratio of unexposed to exposed almost equivalent to 1

190 Generally, sample sizes was calculated for the first and the second objectives and the largest  
 191 sample size was 241 from the first objective and adding 10% for the non-response rate, the final  
 192 sample size is **265**.

## 193 Data collection tools and techniques

194 A face-to-face interviewer administered questionnaire was developed from relevant literature in  
195 the context of the study area. The questionnaire addressed (1) sociodemographic characteristics:  
196 age, gender, place of residency, exercise habits, smoking, and dominant hand; and (2) information  
197 related to previous history of medical illness, including: the presence of diabetes mellitus (DM),  
198 hypertension (HTN), hypothyroidism, and rheumatoid arthritis (RA). The data was collected by  
199 two data collectors and supervised by the principal investigator. The tools for the clinical diagnosis  
200 of CTS were performed by using a standard diagnostic questionnaire used in the previous study; a  
201 score of 5 or more is recommended for use of the test as a diagnostic tool to replace nerve  
202 conduction studies, which is the gold standard test(42).

203 In addition to the standard diagnostic questionnaire, two important clinical tests were performed  
204 to increase the case detection rate. (1) Phalen's wrist flexion test: passively flexing the wrist for  
205 60 seconds produces pain and paraesthesia in the median nerve distribution and implies a positive  
206 result. The test has a sensitivity of 68% and a specificity of 73%. (2) Carpal tunnel compression  
207 test: applying firm pressure directly over the carpal tunnel, usually with the thumbs, for up to 30  
208 seconds to produce symptoms and imply a positive result. This test has a sensitivity of up to 89%  
209 and a specificity of 96 % (18, 43).

210

## 211 **Data quality control**

212 The questionnaire was pretested before the actual data collection period on 5% of the sample size  
213 in Hiwot Fana Specialized University Hospital (HFSUH) to ensure its consistency and validity.  
214 The questionnaire was amended after the pretest. Two days of training were given to the data  
215 collectors on the data collection tool and the data collection procedure by the principal  
216 investigators. The completeness of each questionnaire was checked by the investigator on a daily  
217 basis. Double data entries were done by two data clerks, and the consistency of the entered data  
218 was cross-checked by comparing the two separately entered data on EpiData.

## 219 **3.11. Data analysis and interpretation**

220 The collected data was checked for its completeness, coded and entered into Epi-Data version 3.1  
221 statistical packages than were exported to SPSS version 23 for further analysis. Descriptive  
222 statistics of different variables were presented by frequency and percentage using tables, bar  
223 graphs and pie charts. For descriptive numerical variables mean and standard deviation was  
224 determined. Model fitness was checked by Hosmer-Lemeshow goodness of fit. Bivariable logistic  
225 regression analyses were applied to determine independent variables associated with CTS.  
226 Independent variables that with p-value <0.25 and/or variables shows an association with CTS in  
227 previous studies were illegible to multivariable logistic regression to control for the effect of  
228 confounders. Finally, significantly associated independent variables at p-values < 0.05 was  
229 identified based on the adjusted odds ratio (AOR), with 95% CI.

## 230 **Ethical considerations**

231 The study was carried out after getting approval from the Institution Review Board University of  
232 Gondar. An Official letter was written to the Dilchora referral hospital by the University of Gondar  
233 College of medicine and health sciences and delivered to the facility directors to get permission.  
234 The purpose and objective of the study were elaborated to each informant and verbal consent was  
235 obtained from each study participants. The participants were also be informed that participation  
236 was voluntarily and they well aware of their rights that they could stop or leave participation at  
237 any time they felt any inconvenience or discomfort. To keep the confidentiality of any information  
238 provided by study subjects, the data collection procedure was anonymous.

239

## 240 **Result**

### 241 **Socio-demographic Characteristics**

242 A total of 260 respondents participated in the study. Of these 156 (60 %) women and 115(44.2%)  
243 are house wife. The mean age of the respondents was 52 (SD: 12.4) and majority of the  
244 participants, 206 (79.1%) were urban dwellers. (**Table 1**)

### 245 **Health characteristics of respondents**

246 One hundred twenty-five (48.1%) of the participants had history of past illness. Of these 78 (30  
247 %) had diabetes mellitus and 36 (13.8%) had hypertension. (**Figure 1**)

248 Regarding current musculoskeletal complaints of the participants, 119 (45.8%) experienced neck  
249 pain. Of these, 12(10.1%) had clinically confirmed CTS and 56 (21.5%) of the participants  
250 complained of wrist and hand pain. Of these, 16(28.6%) had clinically confirmed CTS. (**Table 2**)

### 251 **Total score for participant response to clinical diagnostic criteria**

252 Of the total study participants, 146 (56.1%) had symptoms of carpal tunnel syndrome. Of these 28  
253 (10.8 %) patients had a score of more than or equal to 5, which is the threshold for a clinical  
254 diagnosis of CTS. One hundred eighteen (45.4%) of the study subjects had clinically uncertain  
255 score to diagnose the presence of CTS. (**Table 3**)

256 Regarding the clinical examination of the participants, 54 (20.8%) of the subjects experienced pain  
257 and paraesthesia in the median nerve distribution while passively flexing the wrist. Only 18  
258 (33.3%) of them had CTS that is consistence with clinically proven CTS. (**Table 4**)

259

## 260 **Measured anthropometric parameters of hand and wrist dimension**

261 Mean (SD) wrist ratio and hand ratio for the participants were 0.60(SD: 0.113) and 2.40(SD: 0.218)  
262 respectively. **(Figure 2)**

263 Regarding the hand and wrist index 56 (21.5%) of the participants were found to have square  
264 wrists, which are those with a wrist ratio greater than or equal to 0.72. Of a total of the participants  
265 147(56.5%) found to have shorter and wider hands. **(Figure 3)**

## 266 **Prevalence/Magnitude of clinically confirmed CTS**

267 The prevalence of clinically proven carpal tunnel syndrome among study participants was 28  
268 (10.8%) with a 95 % CI: (6.99, 14.6%). Females had the highest frequency, at 22 (14.1%). Age  
269 45 years and older had a higher prevalence of CTS, 19(11.9%). **(Table 5)**

## 270 **Factors associated with carpal tunnel syndrome**

271 Carpal tunnel syndrome was compared with sex, diabetes mellitus, hypertension, wrist ratio greater  
272 than or equal to 0.72, hand ratio less than or equal to 2.1, body mass index greater than or equal to  
273 25 kg/m<sup>2</sup>, and participants' exercise habit in a bivariate logistic regression analysis (p0.05). Before  
274 controlling for confounders, the analysis's findings show that there was a significant association.  
275 **(Table 6)**

276

277

278

279

280

281

## 282 **Discussion**

283 The results of this study indicate that the prevalence of clinically confirmed carpal tunnel  
284 syndrome among patients with musculoskeletal complaints was 28 (10.8%), with a 95 % CI: (6.99  
285 to 14.6). Female gender, being physically inactive or never having exercised, the presence of  
286 diabetes mellitus, the presence of hypertension, hand ratio  $\leq 2.1$  and wrist ratio  $\geq 0.72$  were found  
287 to be risk factors for carpal tunnel syndrome.

288 The results of this study are consistent with findings from studies on diabetes mellitus patients  
289 carried out in Iran and Saudi Arabia. There were 8.56% and 6.7% prevalence rates,  
290 respectively(44,45). The outcome of this study is also consistent with a study among office  
291 employees in China, where the prevalence of clinically confirmed CTS was 9.6%(24).

292 In contrast, the result of the present study is lower than the findings of the studies conducted among  
293 diabetic patients in the United Kingdom (20%), India (19.8%), Bangladesh (26%), and Ethiopia  
294 (29.2%)(28,37,46,47). Similarly, the prevalence of CTS in this study was much lower than the  
295 findings of the studies conducted in Saudi Arabia (81.7%) and Korea (71.2%)(9,48). This variation  
296 in prevalence may be attributed to the chosen criteria to define the cases as CTS. In the previous  
297 studies, a more sensitive electro-diagnostic criterion that compares differences between distal  
298 median and ulnar distal sensory latencies was adopted, which can increase the case detection rate.  
299 Additionally, all the previous studies used diabetic patients as the study population, which is one  
300 of the common risk factors for developing carpal tunnel syndrome and the specific relationship of  
301 CTS to diabetes is thought to be due to median nerve entrapment caused by diabetes induced  
302 connective tissue changes.

303 The 10.8% prevalence of carpal tunnel syndrome in the present study is higher as compared with  
304 studies conducted in Arbaminch general hospital (3.1%), Tikur anbesa specialized hospital (1%)  
305 and Jordan (5.5%) (26,49,50). This difference in prevalence might be due to the case definitions  
306 based on symptoms alone in this specific study, leading to relatively higher estimates of disease  
307 prevalence compared to definitions requiring both symptoms and electro-diagnostic study  
308 confirmation.

309 In accordance with the risk factors for developing carpal tunnel syndrome among the participants  
310 in the current study who experienced musculoskeletal complaints, women were 3.26 times more  
311 likely than men to do develop carpal tunnel syndrome. Likewise, a studies in South Korea and  
312 China found that women are 2 to 4 times more likely than men to develop CTS (24,51). Similar  
313 findings from an Iranian study indicate that women are 9.05 times more likely than men to develop  
314 carpal tunnel syndrome (32). This might be due to women having smaller carpal tunnel areas and  
315 volumes than men. Naturally smaller wrists of women may predispose them to the development  
316 of CTS(52). Moreover, it might be related to hormone level fluctuations. Estrogen receptors are  
317 located in the nervous system and their relevant actions are neuron proliferation and regeneration.  
318 As a result, estrogen levels are lower in premenopausal women and can affect the medial nerve  
319 (7).

320 According to the results of the current study, those who have never exercised are 6.23 times more  
321 likely to develop carpal tunnel syndrome than people who engage in physical exercise. Such a  
322 finding is consistent with the results of studies conducted in Saudi Arabia that showed the odds  
323 of having CTS was less than 1 among participants performing physical exercise occasionally  
324 (OR=0.11) (27). The result of this study is also supported by the findings of a case-control study  
325 conducted in the United States reporting that the odds of having CTS were significantly decreased



326 in participants engaging in physical activity(53). This might be due to performing exercises can  
327 strengthen the muscles and improving blood flow to the wrist and hand.

328 Study participants in the current study who had diabetes as a health-related predictor had 4.23  
329 times more likely to develop carpal tunnel syndrome as compared to those with no history of  
330 diabetes. This result is supported by previous studies, which reported that patients with DM were  
331 three times more vulnerable to CTS compared to the healthy population(51,54). Similarly, A  
332 nationwide population-based cohort study conducted in Taiwan revealed that patients with DM  
333 had the highest risk for diabetic hand syndromes (DHS), including CTS(55). This might be due to  
334 an increased serum glucose level resulting in attachment of the glucose to the proteins in the  
335 tendons located in the carpal tunnel. This will, in turn, cause the tendons to become inflamed and  
336 result in focal adherence. Moreover, there is also demyelination of the median nerve and axonal  
337 degeneration, macrophage attraction and activation, release of inflammatory cytokines, nitric  
338 oxide, and the development of "chemical neuritis," which are all consequences of longstanding  
339 hyperglycemia(12).

340 The finding of the present study revealed that, those who had hypertension as health-related  
341 predictor had 6.07 times more likely to develop carpal tunnel syndrome as compared to those with  
342 no history of hypertension. This finding also supported by a study done in Boston indicated that  
343 having hypertension increase the risk of developing CTS by 1.88 times compared with non-  
344 hypertensive individuals(56). This might be due to a long-standing high blood pressure resulting  
345 in a breakdown in the blood-nerve-barrier formed by the inner cells of the perineurium and the  
346 endothelial cells of endoneurial capillaries that accompany the median nerve, increasing the  
347 permeability and causing an accumulation of proteins and inflammatory cells, contributing to  
348 increased endoneurial fluid and the development of edema(7).

349 The result of the present study also found that there was no significant association between body  
350 mass index (overweight and obese participants) and carpal tunnel syndrome. This finding is  
351 inconsistent with the report of a study conducted in Michigan Medical Center, United States, which  
352 indicated that, the odds ratio of obese (BMI > 29 kg/m<sup>2</sup>) compared to slender (BMI <20 kg/m<sup>2</sup>)  
353 individuals was 8.2 more likely to develop CTS and overweight (BMI 25-29 kg/m<sup>2</sup>) and obese  
354 individuals were 2.9 times more likely to develop CTS as compared to slender and normal (BMI  
355 20-25 kg/m<sup>2</sup>) individuals(58). These discrepancies may be a result of the criteria that were used to  
356 define CTS patients in the current study, which may have resulted in these relationships among  
357 subjects with normal BMI. Additionally, the study's participants are over 45 years old, which puts  
358 them at risk for carpal ligament degeneration. Patients with a normal BMI might develop CTS as  
359 a result of this. In contrast to this, the finding of the present study is comparable with that of a  
360 study conducted in India that showed that BMI was not associated with CTS(47).

361 From this study, it was found that patients with a hand ratio of  $\leq 2.1$  had 7.31 times more likely to  
362 develop carpal tunnel syndrome. This finding is supported by an experimental study conducted in  
363 Austria as a result, the hand ratio was significantly higher in the control group (Hand Ratio: 2.20)  
364 as compared with the patients' group (Hand Ratio: 2.0)(19). This might be due to the assumption  
365 that shorter and wider hands (hand ratio  $\leq 2.1$ ) need extra force during normal hand movement,  
366 which leads to increased pressure in the intracarpal area, leading to CTS development (32).

367 The current study found that patients with a wrist ratio greater than 0.72 were 5.94 times more  
368 likely to develop carpal tunnel syndrome. This finding is consistent with the result of a meta-  
369 analysis of 16 studies, which concluded that a wrist ratio above 0.72 was associated with a three-  
370 fold increased risk of CTS(59). Similarly, a study conducted in Turkey showed that patients with  
371 a wrist ratio higher than 0.69 were 8.2 times more likely to have CTS (41). The result of this study

372 is also supported by a cohort study that confirms 99% of normal laborers with square wrists (Wrist  
373 Ratio > 0.75) develop CTS (60). Moreover, the finding of this study was supported by an  
374 experimental study conducted in Greece as a result, the wrist ratio was significantly correlated  
375 with the carpal tunnel ratio (CTR) (22). This might be due to the assumption that the more square  
376 the wrist shape, the greater volar extension or flexion is required for a given motion, and this leads  
377 to median nerve compression and the development of CTS(17).

378

379

## 380 **Conclusion and recommendations**

### 381 **Conclusion**

382 The prevalence of carpal tunnel syndrome among patients with musculoskeletal complaints was  
383 10.8%.

384 Being female, being physically inactive or never had exercise, presence of diabetes mellitus, the  
385 presence of hypertension, hand ratio  $\leq 2.1$  and wrist ratio  $\geq 0.72$  are the common risk factors  
386 identified in this study. There were statistically significant (P- value  $<0.05$ ) association with the  
387 outcome variable (CTS).

### 388 **Recommendations**

389 It is necessary to do additional research by increasing the number of the participants.

390 The assessment of the wrist and hand dimensions should then be a crucial component of care for  
391 patients with musculoskeletal complaints who also have diabetes mellitus and high blood pressure.

392

## 393 **References**

- 394 1. B. W. Self-Reported Work Related Musculoskeletal Disorders and Determinant Factors of  
395 Female Beauty Salon Hair Dressers, In Addis Ababa, Ethiopia. 2016. 2016;
- 396 2. Susatia B, Martiningsih W, Wahito Nugroho HS. A response to prevalence and associated  
397 factors of musculoskeletal disorders among cleaners working at mekelle university,  
398 Ethiopia. *J Pain Res.* 2020;13:2707–8.
- 399 3. Kristeen Cherney. *Musculoskeletal Disorders.* Heal media. 2018
- 400 4. Al. GM et. A handy review of carpal tunnel syndrome toms. *World J Radiol.*  
401 2014;6(6):284–301.
- 402 5. Daniell WE, Fulton-Kehoe D FG. Work-related carpal tunnel syndrome in Washington  
403 State workers' compensation: Utilization of surgery and the duration of lost work. *Am J Ind*  
404 *Med.* 2009;(52):931-942.
- 405 6. Arslan Y, Bülbül İ, Öcek L, Şener U, Zorlu Y. Effect of hand volume and other  
406 anthropometric measurements on carpal tunnel syndrome. *Neurol Sci.* 2017;38(4):605–10.
- 407 7. Trybus M, Stepanczak B, Koziej M, Gniadek M, Kolodziej M, Holda MK. Hand  
408 anthropometry in patients with carpal tunnel syndrome: A case-control study with a  
409 matched control group of healthy volunteers. *Folia Morphol.* 2019;78(1):182–90.
- 410 8. Padua L, Coraci D, Erra C, Pazzaglia C, Paolasso I, Loreti C, et al. Carpal tunnel syndrome:  
411 clinical features, diagnosis, and management. *Lancet Neurol [Internet].* 2016;15(12):1273–  
412 84. Available from: [http://dx.doi.org/10.1016/S1474-4422\(16\)30231-9](http://dx.doi.org/10.1016/S1474-4422(16)30231-9)
- 413 9. Alotaibi SNS, Alqahtani SSM, Alammar RMS, Alqahtani MSA, Alshehri SAM, Alshehri  
414 SFS, et al. The Prevalence and Patterns of Carpal Tunnel Syndrome and Their Associated  
415 Risk Factors Among Diabetic Population In South-West of Kingdom of Saudi Arabia.

- 416 2018;70(January):1152–8.
- 417 10. Mondelli M, Curti S, Farioli A, Aretini A, Ginanneschi F, Greco G, et al. Anthropometric  
418 measurements as a screening test for carpal tunnel syndrome: Receiver operating  
419 characteristic curves and accuracy. *Arthritis Care Res.* 2015;67(5):691–700.
- 420 11. Do Carpal Tunnel Hands Have Different Shape. 2021;180(July 2019):180–8.
- 421 12. I. Ibrahim, W.S. Khan NG and PS. Carpal tunnel syndrome: a review of the literature. *Open*  
422 *Orthop Journal*,. 2012;(6):69–76.
- 423 13. Abumunaser LA. Demographic pattern of carpal tunnel syndrome in western Saudi Arabia.  
424 2012; 17(1):44-7
- 425 14. Nigel L Ashworth. sign and symptom of CTS.pdf [Internet]. *emedicine.medscape*; 2022.  
426 Available from: <https://emedicine.medscape.com/article/327330>
- 427 15. Dunning KK, Davis KG, Cook C, Kotowski SE, Hamrick C, Jewell G LJ. Costs by industry  
428 and diagnosis among musculoskeletal claims in a state workers compensation system. *Am*  
429 *J Ind Med.* 2010;(53):276–84.
- 430 16. Mogka JPM KP. Wrist and carpal tunnel size and shape measurements: effects of posture.  
431 *Clin Biomech.* 2008;(23):1112–1120.
- 432 17. L-P Kamolz, H Beck, W Haslik, R Högler, M Rab, K F Schrögendorfer, M Frey. Carpal tunnel  
433 syndrome: a question of hand and wrist configurations? *j hand surg br.* 2004;29b(4):321–4.
- 434 18. MacDermid JC, Doherty T. Clinical and electrodiagnostic testing of Carpal Tunnel  
435 Syndrome. A narrative review. *J Orthop Sports Phys Ther.* 2004;34(10):565–88.
- 436 19. Imam MH, Hasan MM, ELnemr RA, El-Sayed RH. Body, wrist, and hand anthropometric  
437 measurements as risk factors for carpal tunnel syndrome. *Egypt Rheumatol Rehabil.*  
438 2019;46(1):35–41.

- 439 20. Airem M, Wilson CC, Vardasca R, Luis J. A Review of Carpal Tunnel Syndrome and Its  
440 Association with Age , Body Mass Index , Cardiovascular Risk Factors , Hand Dominance  
441 , and Sex. *www.mdpi.com/journal/applsci*. 2020;(10):3488.
- 442 21. Chandra A, Chandna P, Deswal S. Estimation of hand index for male industrial workers of  
443 Haryana State (India). *Int J Eng Sci Technol*. 2018;5(1):55–65.
- 444 22. Chiotis K, Dimisianos N, Rigopoulou A, Chrysanthopoulou A, Chroni E. Role of  
445 anthropometric characteristics in idiopathic carpal tunnel syndrome. *Arch Phys Med*  
446 *Rehabil*. 2013;94(4):737–44.
- 447 23. Genova A, Dix O, Saefan A et al. (March. Carpal tunnel syndrome: a review of the  
448 literature. *Dent Hyg (Chic)*. 62(7):316–20.
- 449 24. Feng B, Chen K, Zhu X, Ip W, Andersen LL, Page P, et al. Prevalence and risk factors of  
450 self-reported wrist and hand symptoms and clinically confirmed carpal tunnel syndrome  
451 among office workers in China : a cross-sectional study. 2021;1–10.
- 452 25. Raman SR, Al-halabi B, Hamdan E, Landry MD. Prevalence and risk factors associated  
453 with self-reported carpal tunnel syndrome ( CTS ) among office workers in Kuwait. *BMC*  
454 *Res Notes*. 2012;(5):2–7.
- 455 26. Gebremickael A, Getachew T, Churko C, Alelign D. Prevalence and Associated Factors of  
456 Carpal Tunnel Syndrome Among Diabetic Patients in Arba Minch General Hospital , South  
457 West. 2022; 983–93.
- 458 27. Al Shahrani E, Al Shahrani A, Al-Maflehi N. Personal factors associated with carpal tunnel  
459 syndrome (CTS): a case-control study. *BMC Musculoskelet Disord*. 2021;22(1):1–7.
- 460 28. Fasika S, Abebe SM, Kebede AG. The prevalence of shoulder and hand complications and  
461 associated factors among diabetic patients at University of Gondar Teaching Referral

- 462 Hospital in Northwest Ethiopia. *J Diabetes Res Clin Metab.* 2013;2(1):8.
- 463 29. Chroni E, Paschalis C, Arvaniti C, Zotou K, Nikolakopoulou A, Papapetropoulos T. Carpal  
464 tunnel syndrome and hand configuration. *Muscle and Nerve.* 2001;24(12):1607–11.
- 465 30. Sanya EO, Adebayo PB, Babalola MO, Ibraheem HG. Carpal Tunnel Syndrome and  
466 Other Entrapment Neuropathies. *oman Med J.* 2017;32(6):449–54.
- 467 31. Thurston nlaa. association of obesity, gender, age and occupation with carpal tunnel  
468 syndrome. *auur nz j surg.* 2005;(68):190–3.
- 469 32. Moghtaderi A, Izadi S, Sharafadinzadeh N. An evaluation of gender, body mass index, wrist  
470 circumference and wrist ratio as independent risk factors for carpal tunnel syndrome. *Acta*  
471 *Neurol Scand.* 2005;112(6):375–9.
- 472 33. Boz C, Ozmenoglu M, Altunayoglu V et al. Individual risk factors for carpal tunnel  
473 syndrome: an evaluation of body mass index, wrist index and hand anthropometric  
474 measurements. *Clin Neurol Neurosurg.* 2004;106(4):294–299.
- 475 34. Sharifi-Mollayousefi A, Yazdchi-Marandi M, Ayramlou H et al. Assessment of body mass  
476 index and hand anthropometric measurements as independent risk factors for carpal tunnel  
477 syndrome. *Folia Morphol.* 2008;67(1):36–42.
- 478 35. Lim PG, Tan S, Ahmad TS. The role of wrist anthropometric measurement in idiopathic  
479 carpal tunnel syndrome. *J Hand Surg Eur Vol.* 2008;33(5):645–7.
- 480 36. Geoghegan JM, Clark DI, Bainbridge LC, Smith C, Hubbard R. Risk factors in carpal tunnel  
481 syndrome. *J Hand Surg Am.* 2004;29(4):315–20.
- 482 37. Islam MN, Hoque Chowdhury MSJ, Chowdhury MTI, Chowdhury AH, Islam M, Hossain  
483 E, et al. Identification of Common Risk Factors Associated with Carpal Tunnel Syndrome.  
484 *Bangladesh J Neurosci.* 2013;29(2):70–8.



- 485 38. Misganaw Dr. A, Mariam DH, Ali A, Araya T. Epidemiology of major non-communicable  
486 diseases in Ethiopia: A systematic review. *J Heal Popul Nutr.* 2014;32(1):1–13.
- 487 39. Guan W, Lao J, Gu Y, Zhao X, Rui J, Gao K. Case-control study on individual risk factors  
488 of carpal tunnel syndrome. *Exp Ther Med.* 2018;2761–6.
- 489 40. Farmer JE, Davis TRC. Carpal tunnel syndrome: A case-control study Evaluating its  
490 relationship with body mass index and hand and wrist measurements. *J Hand Surg Eur Vol.*  
491 2008;33(4):445–8.
- 492 41. Ozcakir S, , D. Sigirli HA. High Wrist Ratio is a Risk Factor for Carpal Tunnel Syndrome.  
493 John Wiley Sons, Inc This. 2015;
- 494 42. Kamath V, Stothard J. A clinical questionnaire for the diagnosis of carpal tunnel syndrome.  
495 *J Hand Surg Am.* 2003;28 B(5):455–9.
- 496 43. Mar Hanson BC joshua P and AP. Carpal tunnel syndrome\_ identification ...anagement -  
497 The Pharmaceutical Journal.pdf. pharmaceutical journal.com; 2021.
- 498 44. Kiani J, Goharifar H, Moghimbeigi A AH. Prevalence and risk factors of five most common  
499 upper extremity disorders in diabetics. *J Res Heal Sci.* 2014;14(1):93–6.
- 500 45. Alotaibi SN, Alqahtani SS, Alammam RM et al. The prevalence and patterns of carpal tunnel  
501 syndrome and their associated risk factors among diabetic population in South-West of  
502 Kingdom of Saudi Arabia. *Egypt J Hosp Med.* 2018;7(70):1152–1158.
- 503 46. Ramchurn N, Mashamba C, Leitch E et al. Upper limb musculoskeletal abnormalities and  
504 poor metabolic control in diabetes. *Eur J Intern Med.* 20(7):718–721.
- 505 47. Paranthakan C GP. A study on carpal tunnel syndrome among diabetes patients in tertiary  
506 care hospital. *Int J Community Med Public Heal.* 2016;3:805–807.
- 507 48. Oktayoglu P, Nas K KF et al. Assessment of the Presence of Carpal Tunnel Syndrome in

- 508 Patients with Diabetes Mellitus, Hypothyroidism and Acromegaly. *J Clin Diagn Res.*  
509 2015;9(6):14–8.
- 510 49. Wamisho BL FY. Epidemiology and clinical profile of common musculoskeletal diseases  
511 in patients with diabetes mellitus at Tikur Anbessa Specialized Hospital in Addis Ababa,  
512 Ethiopia. *East Cent Afr J Surg.* 2017;22(2):49–62.
- 513 50. Mustafa KN, Khader YS, Bsoul AK AK. Musculoskeletal disorders of the hand in type 2  
514 diabetes mellitus: prevalence & its associated factors. *Int J Rheum Dis.* 2016;19(7):730–5.
- 515 51. D HLM, Sum H, Ph L, D HSKM. Title Page Validation of known risk factors associated  
516 with carpal tunnel syndrome : A retrospective nationwide 11-year population-based cohort  
517 study in South Validation of known risk factors associated with carpal tunnel syndrome : A  
518 retrospective nation. 2018;1–25.
- 519 52. Newington L, Harris EC W-BK. Carpal tunnel syndrome and work. *Best Pr Res Clin*  
520 *Rheumatol.* 2015;29(30):440–53.
- 521 53. Goodson JT, DeBerard MS, Wheeler AJ, Colledge AL. Occupational and biopsychosocial  
522 risk factors for carpal tunnel syndrome. *J Occup Environ Med.* 2014;56(9):965–72.
- 523 54. Karpitskaya Y, Novak CB MS. Prevalence of smoking, obesity,diabetes mellitus, & thyroid  
524 disease in patients with carpal tunnel syndrome. *Ann Plast Surg.* 2002;48(3):269–73.
- 525 55. Chen LH, Li CY, Kuo LC et al. Risk of Hand Syndromes in Patients With Diabetes  
526 Mellitus: A Population-Based Cohort Study in Taiwan. 2015;
- 527 56. Zhang D, Collins J, Blazar P, Earp BE. Factors Associated With Advanced Presentation for  
528 Carpal Tunnel Release. *J Hand Surg Am [Internet].* 2019;1–6. Available from:  
529 <https://doi.org/10.1016/j.jhsa.2019.08.016>
- 530 57. Ribeiro h, filho dp. profile of patients with carpal tunnel syndrome treated at a referral

531 service perfil de pacientes com síndrome do túnel do. 2020;28(3):117–20.

532 58. Nathan PA, Keniston RC, Meadows KD, Lockwood RS. The relationship between body  
533 mass index and the diagnosis of carpal tunnel syndrome. Muscle Nerve [Internet].  
534 1994;17(12):1491–3.

535 59. R. S. A square-shaped wrist as a predictor of carpal tunnel syndrome: A meta-analysis.  
536 Muscle Nerve. 2015;52:709–13.

537 60. KS. E. Square wrists and carpal tunnel syndrome. Ohio Med. 1990;86:432–3.

538

539

540

541

542

543

544

545

546

547

548

549 **ANNEX**

550 **Legends: Tables and Figures**

551 **Tables:**

552 **Table 1:** Socio-Demographic Characteristics of Study Subjects for Prevalence of Carpal Tunnel  
553 Syndrome and its associated factors among patients with a musculoskeletal complaint in Dilchora  
554 referral Hospital, Eastern Ethiopia, 2022. (n=260)

555 **Table 2:** Musculoskeletal skeletal complaint of the participants attending Dilchora referral  
556 hospital, Eastern Ethiopia, 2022.

557 **Table 3:** The overall score in response to the clinical diagnostic criterion for prevalence of carpal  
558 tunnel syndrome and its associated factors among patients with musculoskeletal complaint in  
559 Dilchora referral hospital, Eastern Ethiopia, 2022.(n=260)

560 **Table 4:** The proportion of participants who had medical examination to ascertain the prevalence  
561 of carpal tunnel syndrome and its associated factors among patients with musculoskeletal  
562 complaint in Dilchora referral hospital, Eastern Ethiopia, 2022. (n=260)

563 **Table 5:** The prevalence of CTS by participant's age, gender and past medical illness (n=260)

564 **Table-6:** Bivariate relationship between selected variables with carpal tunnel syndrome at  
565 Dilchora referral Hospital, Dire Dawa, Eastern Ethiopia, 2022. (n=260)

566 **Table 7:** Multiple logistic regression of carpal tunnel syndrome with predictor variables in  
567 Dilchora referral hospital, Dire Dawa, Eastern Ethiopia, 2022. (n=260)

568

569 **Figures:**

570 **Figure 1:** Health traits of study participants attending Dilchora referral hospital, Eastern Ethiopia,  
571 2022.

572 **Figure 2:** Mean and standard deviation of wrist and hand dimension of the study participants  
573 attending Dilchora referral hospital, Eastern Ethiopia, 2022.

574 **Figure 3:** Distribution of hand and wrist ratio of study participants attending Dilchora referral  
575 hospital, Eastern Ethiopia, 2022.

576

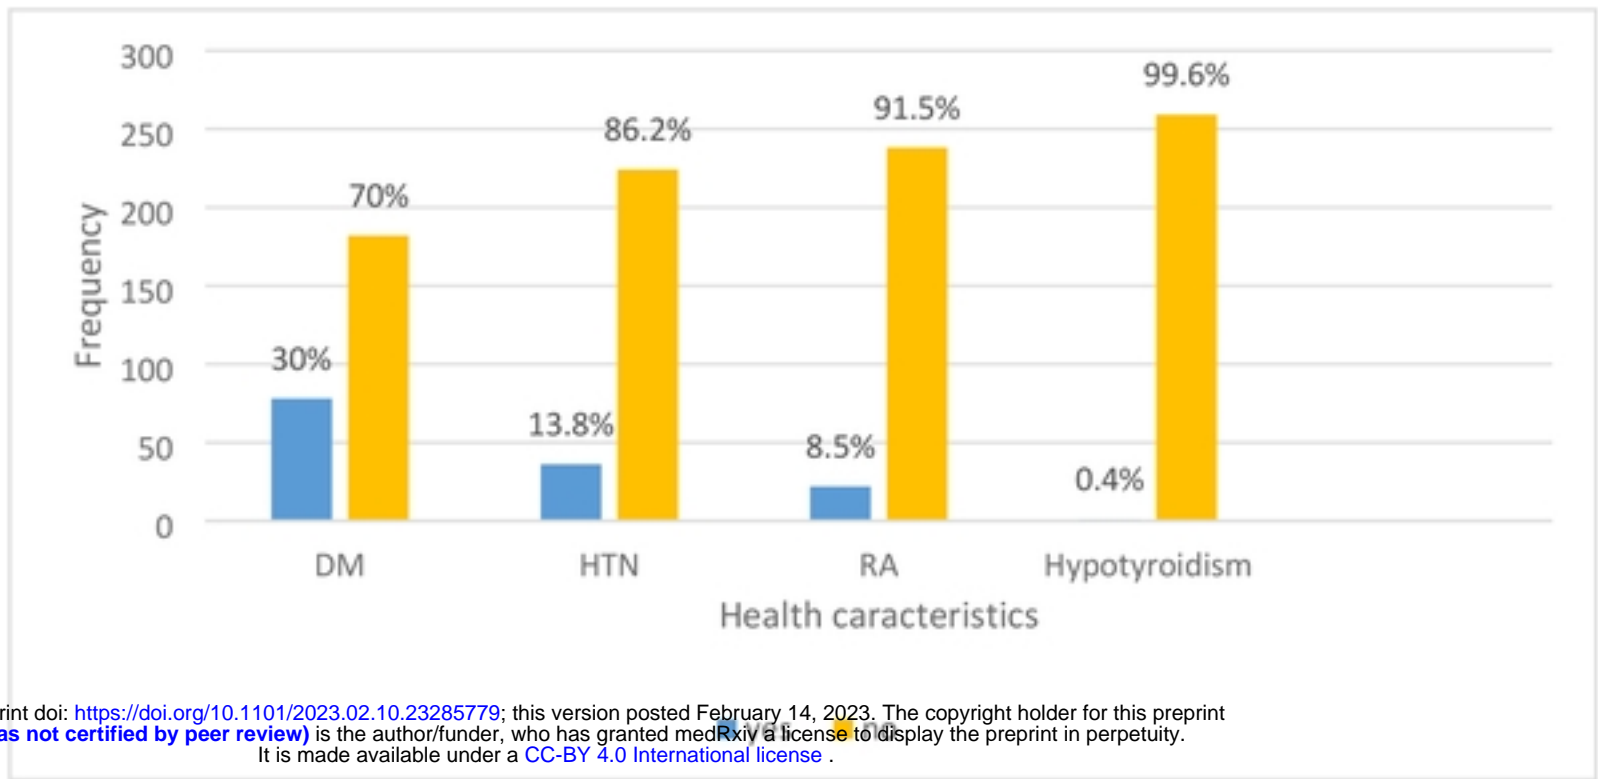

medRxiv preprint doi: <https://doi.org/10.1101/2023.02.10.23285779>; this version posted February 14, 2023. The copyright holder for this preprint (which was not certified by peer review) is the author/funder, who has granted medRxiv a license to display the preprint in perpetuity. It is made available under a [CC-BY 4.0 International license](https://creativecommons.org/licenses/by/4.0/).

**Figure 4:** Health traits of study participants attending Dilchora referral hospital, Eastern Ethiopia, 2022.

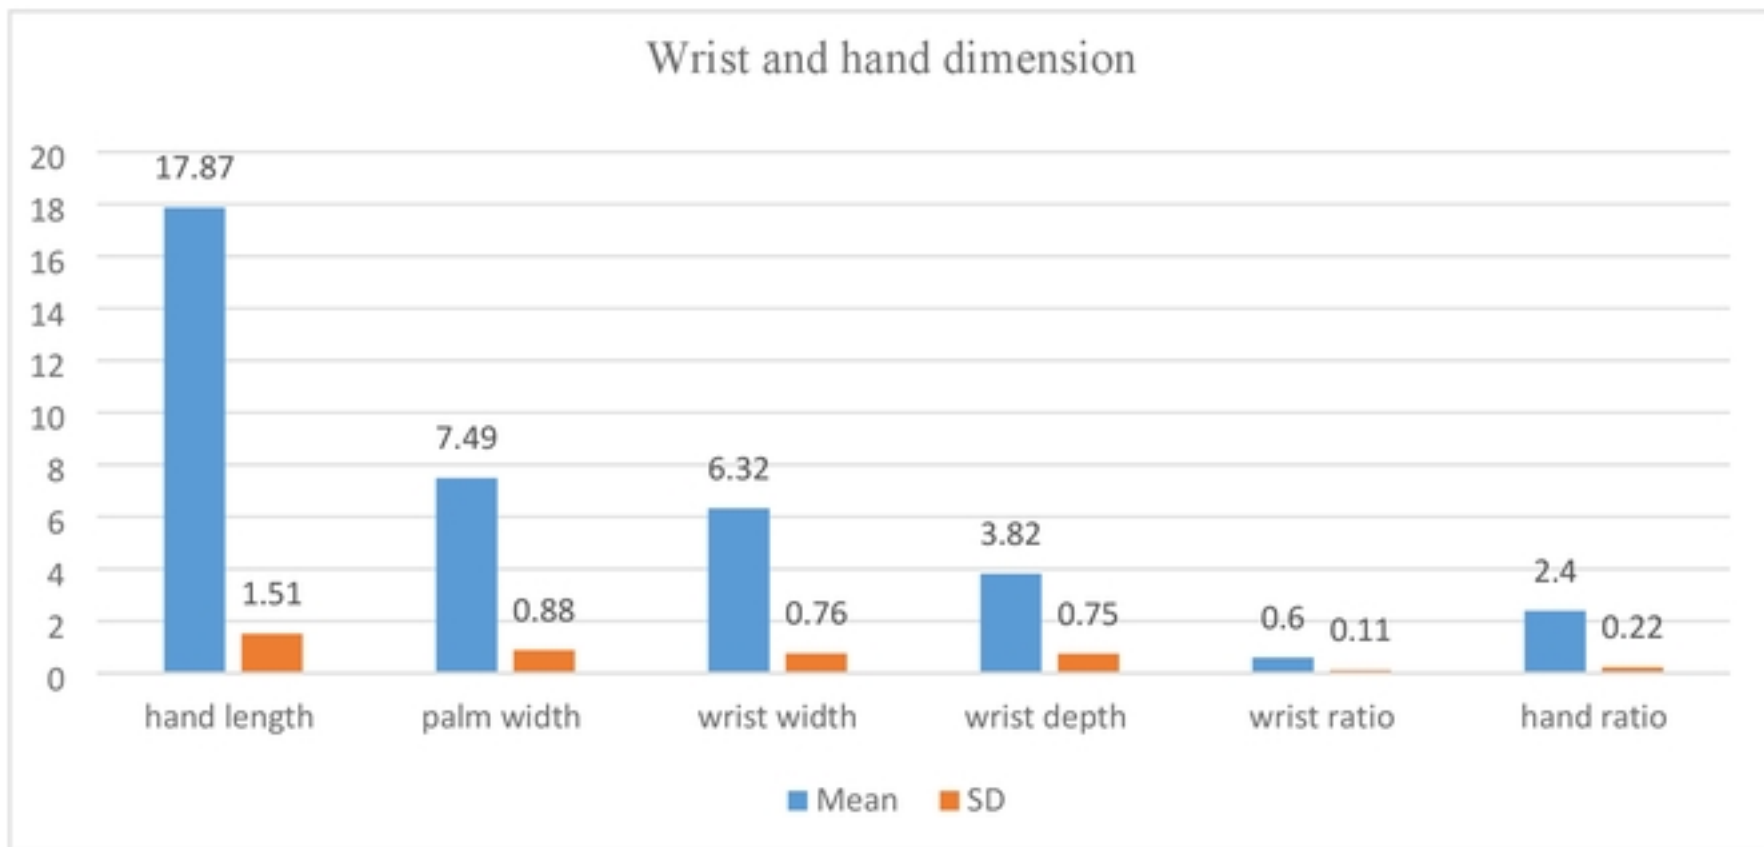

**Figure 5:** Mean and standard deviation of wrist and hand dimension of the study participants attending Dilchora referral hospital, Eastern Ethiopia, 2022.

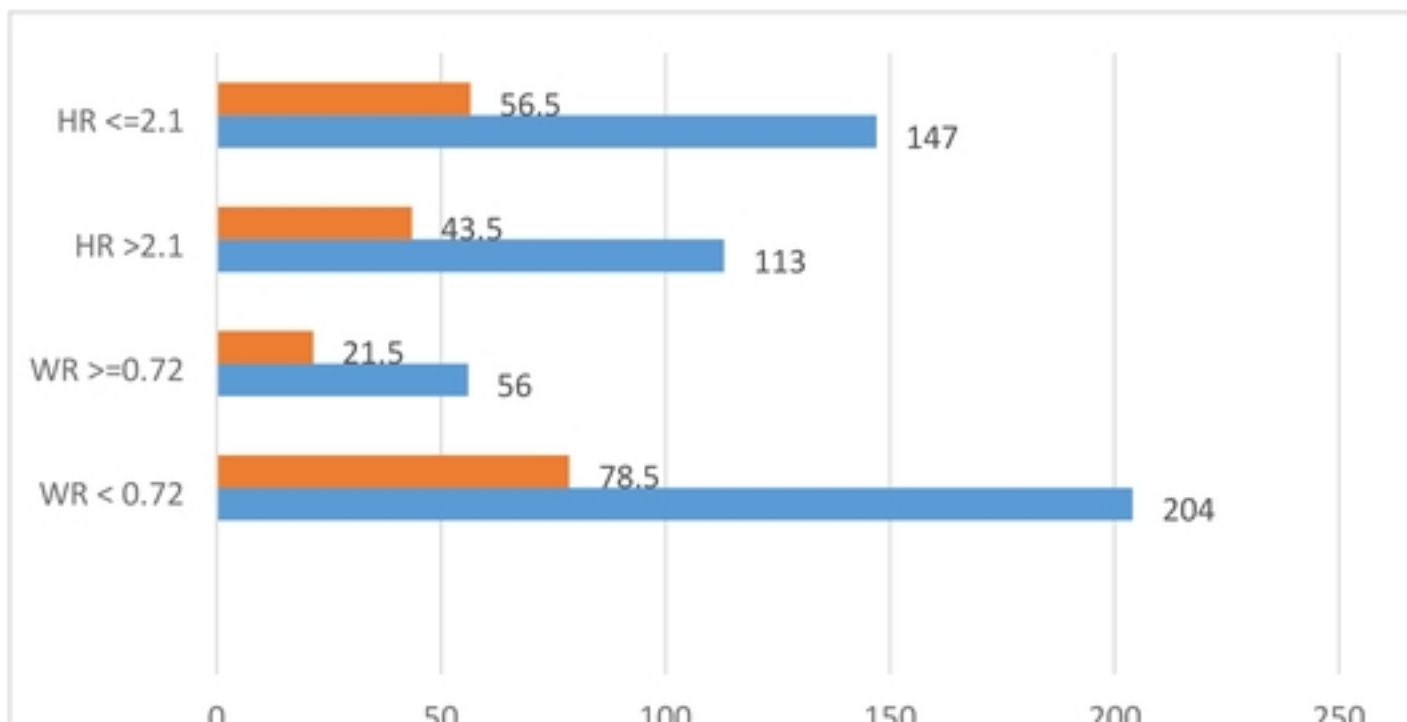

**Figure 6:** Distribution of hand and wrist ratio of study participants attending Dilchora referral hospital, Eastern Ethiopia, 2022.

medRxiv preprint doi: <https://doi.org/10.1101/2023.02.10.23285779>; this version posted February 14, 2023. The copyright holder for this preprint (which was not certified by peer review) is the author/funder, who has granted medRxiv a license to display the preprint in perpetuity. It is made available under a [CC-BY 4.0 International license](#).

**Table 1:** Sample size calculation for factors associated with carpal tunnel syndrome

| Variable          | Associated factors of CTS* |             | Calculated sample size | Reference |
|-------------------|----------------------------|-------------|------------------------|-----------|
|                   | Exposed                    | Non Exposed |                        |           |
| Diabetes Mellitus | Yes 17.53%                 | No 82.47%   | 165                    | (39)      |
| Hypertension      | Yes 20.17%                 | No 79.83%   | 179                    | (39)      |

medRxiv preprint doi: <https://doi.org/10.1101/2023.02.10.23285779>; this version posted February 14, 2023. The copyright holder for this preprint (which was not certified by peer review) is the author/funder, who has granted medRxiv a license to display the preprint in perpetuity. It is made available under a [CC-BY 4.0 International license](https://creativecommons.org/licenses/by/4.0/).

**Table 2: Socio-Demographic Characteristics of Study Subjects for Prevalence of Carpal Tunnel Syndrome and its associated factors among patients with a musculoskeletal complaint in Dilchora referral Hospital, Eastern Ethiopia, 2022. (n=260)**

| Variable                 | Frequency  | Percentage (%) |
|--------------------------|------------|----------------|
| <b>Age in years</b>      |            |                |
| <45                      | 100        | 38.5           |
| ≥45                      | <b>160</b> | <b>61.5</b>    |
| <b>Sex</b>               |            |                |
| Male                     | 104        | 40.0           |
| <b>Female</b>            | <b>156</b> | <b>60.0</b>    |
| <b>Occupation</b>        |            |                |
| Factory worker           | 8          | 3.1            |
| Office worker            | 22         | 8.5            |
| <b>House wife</b>        | <b>115</b> | <b>44.2</b>    |
| Unemployed               | 14         | 5.4            |
| Merchant                 | 21         | 8.1            |
| Private business         | 45         | 17.3           |
| Agricultural worker      | 11         | 4.2            |
| Teacher                  | 24         | 9.2            |
| <b>Physical Activity</b> |            |                |
| <b>Had exercise</b>      | <b>159</b> | <b>61.2</b>    |
| Never had exercise       | 101        | 38.8           |
| <b>Habit of smoking</b>  |            |                |



|                |     |      |
|----------------|-----|------|
| Smoker         | 55  | 21.2 |
| Non-smoker     | 205 | 78.8 |
| Hand dominance |     |      |
| Right handed   | 231 | 88.8 |
| Left handed    | 29  | 11.2 |
| BMI            |     |      |
| Normal         | 116 | 44.6 |
| Abnormal       | 143 | 55.4 |

BMI: body mass index

medRxiv preprint doi: <https://doi.org/10.1101/2023.02.10.23285779>; this version posted February 14, 2023. The copyright holder for this preprint (which was not certified by peer review) is the author/funder, who has granted medRxiv a license to display the preprint in perpetuity. It is made available under a [CC-BY 4.0 International license](https://creativecommons.org/licenses/by/4.0/).

**Table 3: Musculoskeletal complaint of the participants attending Dilchora referral hospital, Eastern Ethiopia, 2022.**

| Variable                                  | Frequency (%) | CTS n(%)   |           | P-value* |
|-------------------------------------------|---------------|------------|-----------|----------|
|                                           |               | No         | Yes       |          |
| <b>Current musculoskeletal complaint</b>  |               |            |           | 0.000    |
| Neck pain                                 | 119(45.8%)    | 107(89.9%) | 12(10.1%) |          |
| Back pain                                 | 34(13.1%)     | 34(100%)   |           |          |
| Shoulder pain and stiffness               | 25(9.6%)      | 25(100%)   |           |          |
| Wrist pain, numbness and tingling at hand | 56(21.5%)     | 40(71.4%)  | 16(28.6%) |          |
| Knee pain                                 | 26(10%)       | 26(100%)   |           |          |

\*Fisher's Exact test was done to measure the level of significance, P -Value < 0.05, CTS: Carpal Tunnel Syndrome

**Table 4: The overall score in response to the clinical diagnostic criterion for prevalence of carpal tunnel syndrome and its associated factors among patients with musculoskeletal complaint in Dilchora referral hospital, Eastern Ethiopia, 2022.(n=260)**

| Total score    | Frequency | Percent (%) | Interpretation                          |
|----------------|-----------|-------------|-----------------------------------------|
| A score of "0" | 114       | 43.8        | Wrist and hand symptom is not caused by |

|                  |     |      | CTS                                                                                |
|------------------|-----|------|------------------------------------------------------------------------------------|
| A score of “<3”  | 114 | 43.8 | Unlikely to be indicative of Carpal Tunnel Syndrome                                |
| A score of “3-4” | 4   | 1.6  | Suggests Carpal Tunnel Syndrome is possible cause of symptoms                      |
| A score of “≥5”  | 28  | 10.8 | Strongly suggestive of Carpal Tunnel Syndrome( <b>Define the presence of CTS</b> ) |

medRxiv preprint doi: <https://doi.org/10.1101/2023.02.10.23285779>; this version posted February 14, 2023. The copyright holder for this preprint (which was not certified by peer review) is the author/funder, who has granted medRxiv a license to display the preprint in perpetuity. It is made available under a [CC-BY 4.0 International license](https://creativecommons.org/licenses/by/4.0/).

**Table 5:** The proportion of participants who had medical examination to ascertain the prevalence of carpal tunnel syndrome and its associated factors among patients with musculoskeletal complaint in Dilchora referral hospital, Eastern Ethiopia, 2022. (n=260)

| Type of test                     | Test Result | Frequency (%) | CTS Status |            |
|----------------------------------|-------------|---------------|------------|------------|
|                                  |             |               | Yes        | No         |
| <b>Phalen’s wrist flexion</b>    | +           | 54(20.8)      | 18(33.3%)  | 36(66.7%)  |
|                                  | -           | 206(79.2)     | 10(4.9%)   | 196(95.1%) |
| <b>Carpal Tunnel Compression</b> | +           | 56(21.5)      | 19(33.9%)  | 37(66.1%)  |
|                                  | -           | 204(78.5)     | 9(4.4%)    | 195(95.6%) |

Chi square test was done to measure the level of significance, +: Positive, - : Negative, CTS: carpal tunnel syndrome,

**Table 6:** The prevalence of CTS by participant’s age, gender and past medical illness (n=260)

| Variable   | CTS       |            | P-Value* |
|------------|-----------|------------|----------|
|            | No, n (%) | Yes, n (%) |          |
| <b>Sex</b> |           |            |          |
| Male       | 98(94.2%) | 6(5.8%)    | 0.034    |

|                               |            |           |       |
|-------------------------------|------------|-----------|-------|
| Female                        | 134(85.9%) | 22(14.1%) |       |
| <b>Age</b>                    |            |           |       |
| <45                           | 91(91.0%)  | 9(9.0%)   | 0.467 |
| <u>≥</u> 45                   | 141(88.1%) | 19(11.9%) |       |
| <b>Past medical condition</b> |            |           |       |
| DM                            |            |           | 0.02  |
| Yes                           | 66(80.5%)  | 16(19.5%) |       |
| No                            | 166(93.3%) | 12(6.7%)  |       |
| HTN                           |            |           | 0.02  |
| Yes                           | 103(83.1%) | 21(16.9%) |       |
| No                            | 129(94.9%) | 7(5.1%)   |       |

medRxiv preprint doi: <https://doi.org/10.1101/2023.02.10.23285779>; this version posted February 14, 2023. The copyright holder for this preprint (which was not certified by peer review) is the author/funder, who has granted medRxiv a license to display the preprint in perpetuity. It is made available under a [CC-BY 4.0 International license](https://creativecommons.org/licenses/by/4.0/).

\* Chi-square test, P-Value <0.05, CTS: carpal tunnel syndrome, DM: diabetes mellitus, HTN: hypertension

**Table-7** Bivariate relationship between selected variables with carpal tunnel syndrome at Dilchora referral Hospital, Dire Dawa, Eastern Ethiopia, 2022. (n=260)

| Variable                 | Carpal tunnel syndrome |           | COR(95%CI)         | p-value      |
|--------------------------|------------------------|-----------|--------------------|--------------|
|                          | No, n                  | Yes, n    |                    |              |
| <b>Sex</b>               |                        |           |                    |              |
| Female                   | 134(85.9%)             | 22(14.1%) | 2.682(1.048,6.862) | <b>0.040</b> |
| Male                     | 98(94.2%)              | 6(5.8%)   | 1.00               |              |
| <b>Exercise habit</b>    |                        |           |                    |              |
| Never had exercise       | 84(83.2%)              | 17(16.8%) | 2.723(1.218,6.086) | <b>0.015</b> |
| Had exercise             | 148(93.1%)             | 11(6.9%)  | 1.00               |              |
| <b>Diabetes mellitus</b> |                        |           |                    |              |
| Yes                      | 66(80.5%)              | 16(19.5%) | 3.354(1.505,7.471) | <b>0.003</b> |
| No                       | 166(93.3%)             | 12(6.7%)  | 1.00               |              |
| <b>Hypertension</b>      |                        |           |                    |              |
| Yes                      | 103(83.1%)             | 21(16.9%) | 3.757(1.537,9.184) | <b>0.04</b>  |

|                                     |            |           |                    |              |
|-------------------------------------|------------|-----------|--------------------|--------------|
| No                                  | 129(94.9%) | 7(5.1%)   | 1.00               |              |
| <b>Body mass index</b>              |            |           |                    |              |
| <b>BMI*</b>                         |            |           |                    |              |
| >25kg/m <sup>2</sup>                | 95(83.3%)  | 19(16.7%) | 3.044(1.321,7.018) | <b>0.009</b> |
| ≤24.99                              | 137(93.8%) | 9(6.2%)   | 1.00               |              |
| <b>Hand and wrist anthropometry</b> |            |           |                    |              |
| <b>HR*</b>                          |            |           |                    |              |
| ≤2.1                                | 122(83%)   | 25(17%)   | 7.514(2.20,25.57)  | <b>0.01</b>  |
| >2.1                                | 210(97.3%) | 3(2.7%)   | 1.00               |              |
| <b>WR*</b>                          |            |           |                    |              |
| ≥0.72                               | 42(75%)    | 14(25%)   | 4.524(2.07,10.196) | <b>0.000</b> |
| <0.72                               | 190(93.1%) | 14(6.9%)  | 1.00               |              |

**WR\*: wrist ratio, HR\*: hand ratio, BMI\*: body mass index**

**Table 8:** Multiple logistic regression of carpal tunnel syndrome with predictor variables in Dilchora referral hospital, Dire Dawa, Eastern Ethiopia, 2022. (n=260)

| Variables         |                                | Carpal tunnel syndrome |           | COR (95% CI)     | AOR (95% CI)              |
|-------------------|--------------------------------|------------------------|-----------|------------------|---------------------------|
|                   |                                | No                     | Yes       |                  |                           |
| Sex               | <b>Female(Ref)</b>             | 134(85.9%)             | 22(14.1%) | 2.68(1.04, 6.86) | <b>3.26(1.05, 10.08)*</b> |
|                   | <b>Male</b>                    | 98(94.2%)              | 6(5.8%)   | 1.00             | 1.00                      |
| Physical Exercise | <b>Never had exercise(Ref)</b> | 84(83.2%)              | 17(16.8%) | 2.72(1.21,6.08)  | <b>6.32(1.95, 20.52)*</b> |
|                   | <b>Had exercise</b>            | 148(93.1%)             | 11(6.9%)  | 1.00             | 1.00                      |
| Diabetes Mellitus | <b>Yes(Ref)</b>                | 66(80.5%)              | 16(19.5%) | 3.35(1.50,7.47)  | <b>4.23(1.47, 11.97)*</b> |
|                   | <b>No</b>                      | 166(93.3%)             | 12(6.7%)  | 1.00             | 1.00                      |

|              |                                     |            |           |                   |                           |
|--------------|-------------------------------------|------------|-----------|-------------------|---------------------------|
| Hypertension | <b>Yes(Ref)</b>                     | 103(83.1%) | 21(16.9%) | 3.75(1.53, 9.18)  | <b>6.07(1.70, 21.65)*</b> |
|              | <b>No</b>                           | 129(94.9%) | 7(5.1%)   | 1.00              | 1.00                      |
| BMI *        | <b>&gt;=25kg/m<sup>2</sup>(Ref)</b> | 95(83.3%)  | 19(16.7%) | 3.04(1.32,7.01)   | 1.84(0.67, 5.05)          |
|              | <b>&lt;=24.9 kg/m<sup>2</sup></b>   | 137(93.8%) | 9(6.2%)   | 1.00              | 1.00                      |
| HR*          | <b>&lt;=2.1(Ref)</b>                | 122(83%)   | 25(17%)   | 7.514(2.20,25.57) | <b>7.31(1.80, 29.66)</b>  |
|              | <b>&gt;2.1</b>                      | 210(97.3%) | 3(2.7%)   | 1.00              | *                         |
| WR*          | <b>&gt;=0.72(Ref)</b>               | 42(75%)    | 14(25%)   | 4.52(2.07,10.19)  | <b>5.94(2.11, 16.72)*</b> |
|              | <b>&lt;0.72</b>                     | 190(93.1%) | 14(6.9%)  | 1.00              | 1.00                      |

medRxiv preprint doi: <https://doi.org/10.1101/2023.02.10.23285779>; this version posted February 14, 2023. The copyright holder for this preprint (which was not certified by peer review) is the author/funder, who has granted medRxiv a license to display the preprint in perpetuity. It is made available under a [CC-BY 4.0 International license](https://creativecommons.org/licenses/by/4.0/).

\*Significant association at AOR P-value< 0.05 BMI \* **body mass index** HR\* **hand ratio** WR\* **wrist ratio, Ref: reference variable**
